# Supplementary material
Source: MDPI journal article supplement (https://www.mdpi.com/2071-1050/8/2/131)
Supplement: s1 [file s1]

## Sheet: Soil Biochar Data
Soil and Biochar
	soil pH in DI water (1:5)	KCl-extractable NH4+	KCl-extractable NO3-	Olsen-extractable P	Ammonium acetate extractable K	Ammonium acetate extractable Ca	Ammonium acetate extractable Mg	Ammonium acetate extractable Na
		mg kg-1	mg kg-1	mg kg-1	mg kg-1	mg kg-1	mg kg-1	mg kg-1
Soil	6.52	25.0028	1.82501	9.64126	511.916	787.833	251.855	81.5902
Soil	6.86	22.1258	1.29465	7.62037	503.66	790.954	248.351	63.9219
Soil	6.46	22.6117	1.48608	11.0761	561.834	872.658	280.876	68.9718
CC UT	9.2	10.2839	0.352357	140.977	17686.9	146.023	462.616	643.649
CC UT	9.23	11.4506	2.65163	107.769	15117.9	122.454	388.232	499.517
CC UT	9.17	10.0086	0.100278	138.471	16309.6	139.458	446.641	462.652
CC T	9.57	30.6556	ND	177.945	8257.82	153.182	514.909	6870.85
CC T	9.61	33.4072	ND	209.9	7075.01	127.358	450.253	5913.18
CC T	9.61	30.1543	ND	175.439	8256.78	158.597	504.85	6870.37
SS UT	6.77	211.63	ND	359.391	1457.22	1494.53	220.052	12213
SS UT	6.85	184.873	ND	289.402	912.62	1012.09	167.87	7691.78
SS UT		252.936	ND	468.469	1231.39	1214.02	181.786	13326
SS T	6.87	36.6082	ND	1263.98	906.19	1484.09	225.526	3523.65
SS T	6.84	26.8015	ND	1289.33	937.475	1521.91	221.548	4279
SS T		36.4859	ND	1302.52	1202.5	2044.37	318.952	4811.83
	For SS biochars pH measured on two replicates
Soil Data
Treatment	Biochar	Fertilizer	Crop	Rep	soil pH in DI water (1:5)	Olsen-extractable P	Ammonium acetate extractable K	Ammonium acetate extractable Ca	Ammonium acetate extractable Mg	Ammonium acetate extractable Na	Total Nitrogen	Total Organic Carbon
						mg kg-1					%
Control	CC	0	0	1	6.18	7.72747	535.221	793.536	282.58	294.064	0.148864	1.2847
Control	CC	0	0	2	6.17	8.84528	542.999	835.727	290.981	298.835	0.147173	1.2701
Control	CC	0	0	3	6.15	7.41087	540.302	873.969	303.932	283.589	0.136501	1.178
Control	CC	0	0	4	6.22	9.25387	569.543	933.358	328.74	290.571	0.114834	0.99102
Control	CC	1	0	1	6.16	8.84145	413.256	704.769	218.971	76.9519	0.137254	1.1845
Control	CC	1	0	2	6.2	9.34436	447.57	705.638	226.151	52.4529	0.146396	1.2634
Control	CC	1	0	3	6.15	7.84457	408.958	649.631	206.562	41.4882	0.148899	1.285
Control	CC	1	0	4	6.13	7.22456	438.188	683.971	223.008	47.3433	0.152943	1.3199
Untreated biochar	CC	1	0	1	6.19	10.2498	1072.16	750.643	246.41	114.187	0.279409	2.4113
Untreated biochar	CC	1	0	2	6.25	10.5159	1059.35	787.933	280.997	237.705	0.28146	2.429
Untreated biochar	CC	1	0	3	6.56	10.0626	1106.79	767.451	255.825	75.6691	0.344844	2.976
Untreated biochar	CC	1	0	4	6.24	11.9236	1092.06	766.001	247.914	75.4999	0.301935	2.6057
Treated biochar	CC	1	0	1	7.16	15.4124	876.875	824.269	300.814	452.291	0.317613	2.741
Treated biochar	CC	1	0	2	6.91	15.9396	828.49	800.527	285.23	422.408	0.30489	2.6312
Treated biochar	CC	1	0	3	6.67	20.105	828.055	803.726	289.734	448.549	0.32657	2.8183
Treated biochar	CC	1	0	4	7.24	15.8454	861.583	821.424	308.663	451.268	0.311217	2.6858
Untreated biochar	CC	0	0	1	6.18	10.0292	981.01	840.071	246.91	43.63	0.298401	2.5752
Untreated biochar	CC	0	0	2	6.17	8.80276	967.059	840.348	245.383	44.7143	0.312433	2.6963
Untreated biochar	CC	0	0	3	6.15	8.46	993.38	864.744	259.735	51.8485	0.383627	3.3107
Untreated biochar	CC	0	0	4	6.22	10.5572	970.338	847.438	251.197	46.9816	0.320429	2.7653
Treated biochar	CC	0	0	1	6.19	13.7699	730.178	870.659	257.947	228.368	0.242561	2.0933
Treated biochar	CC	0	0	2	6.25	12.4433	685.031	857.959	248.36	192.544	0.318181	2.7459
Treated biochar	CC	0	0	3	6.56	13.2669	688.965	807.542	242.036	204.596	0.29219	2.5216
Treated biochar	CC	0	0	4	6.24	14.8886	689.983	876.296	254.59	215.502	0.31854	2.749
Control	SS	0	0	1	6.2	26.9977	287.83	926.322	241.042	60.149	0.04194	0.99272
Control	SS	0	0	2	6.14	24.3499	282.823	965.842	255.641	54.6684	0.25976	1.0709
Control	SS	0	0	3	6.23	26.902	286.271	991.24	258.693	49.8132	0.39306	1.1378
Control	SS	0	0	4	6.21	17.6143	283.376	943.294	249.459	52.0781	0.15124	0.99721
Control	SS	1	0	1	6.31	25.7913	264.508	970.249	250.382	46.2132	0.17287	0.97835
Control	SS	1	0	2	6.19	25.0982	274.865	1014.56	262.4	53.4011	0.10843	1.1547
Control	SS	1	0	3	6.16	3.6598	268.363	956.952	247.42	50.8468	0.13049	1.0249
Control	SS	1	0	4	6.26	0.474287	289.75	972.704	247.66	51.3982	0.05445	1.1438
Untreated biochar	SS	0	0	1	6.03	20.3347	425.86	1148.25	354.348	638.343	0.29843	1.7486
Untreated biochar	SS	0	0	2	6.1	25.1652	417.52	1143.16	351.725	629.268	0.27068	1.4437
Untreated biochar	SS	0	0	3	6.02	20.5627	441.211	1169.68	365.196	678.8	0.20646	1.4997
Untreated biochar	SS	0	0	4	6.1	22.0226	390.664	1134.26	360.896	714.502	0.23285	1.4251
Untreated biochar	SS	1	0	1	6.1	28.8247	432.929	1126.86	360.399	695.671	0.15029	1.5448
Untreated biochar	SS	1	0	2	6.08	24.8421	431.281	1158.37	367.779	711.042	0.19969	1.448
Untreated biochar	SS	1	0	3	6.03	22.5858	434.161	1126.87	358.948	693.618	0.09552	1.5111
Untreated biochar	SS	1	0	4	6.08	20.0397	436.911	1136.24	363.936	715.192	0.29058	1.7633
Treated biochar	SS	0	0	1	6.55	31.6158	358.6	1050.26	336.351	240.512	0.15827	1.5066
Treated biochar	SS	0	0	2	6.72	28.2917	350.711	1038.63	333.514	226.036	0.21707	1.4278
Treated biochar	SS	0	0	3	6.63	32.2146	366.689	1071.89	376.525	384.483	0.35047	1.9022
Treated biochar	SS	0	0	4	6.49	31.3143	343.925	984.779	353.084	354.082	0.15264	1.7705
Treated biochar	SS	1	0	1	6.65	32.1904	375.583	1117.46	386.461	374.431	0.20025	1.7905
Treated biochar	SS	1	0	2	6.5	32.2645	381.584	1119.86	386.783	365.629	0.10472	1.7979
Treated biochar	SS	1	0	3	6.54	32.9076	375.376	1082.91	380.494	396.995	0.32738	1.8555
Treated biochar	SS	1	0	4	6.67	30.349	368.08	1049.68	386.093	397.89	0.21207	1.6909
Control	CC	0	1	1	6.38	0	382.286	701.586	244.868	209.116
Control	CC	0	1	2	6.42	2.40947	379.722	702.521	249.746	194.547
Control	CC	0	1	3	6.29	0	367.058	732.84	254.125	215.629
Control	CC	0	1	4	6.24	0.207007	381.059	719.72	244.468	207.009
Control	CC	1	1	1	5.84	11.5353	271.138	688.973	230.836	211.944
Control	CC	1	1	2	5.59	2.41442	283.331	682.519	233.782	204.172
Control	CC	1	1	3	5.44	6.45407	363.618	743.603	260.147	203.811
Control	CC	1	1	4	5.36	21.4795	345.073	720.837	244.118	199.81
Untreated biochar	CC	1	1	1	6.06	12.5745	707.62	623.503	223.313	204.178
Untreated biochar	CC	1	1	2	6.03	13.6392	688.486	662.472	232.245	203.32
Untreated biochar	CC	1	1	3	6.01	14.2598	647.155	655.663	235.522	200.982
Untreated biochar	CC	1	1	4	5.9	18.5261	771.901	698.963	251.112	217.524
Treated biochar	CC	1	1	1	6.11	17.5581	525.62	629.759	231.634	338.662
Treated biochar	CC	1	1	2	6.37	18.5546	483.656	686.671	239.48	350.154
Treated biochar	CC	1	1	3	6.16	30.6199	658.1	712.149	254.549	403.94
Treated biochar	CC	1	1	4	6.45	19.722	536.792	747.837	263.593	378.322
Untreated biochar	CC	0	1	1	6.5	11.9343	946.301	913.29	246.262	67.4921
Untreated biochar	CC	0	1	2	6.7	9.39843	906.973	869.366	239.586	60.4616
Untreated biochar	CC	0	1	3	6.72	10.2639	921.227	936.281	252.555	67.3311
Untreated biochar	CC	0	1	4	6.77	9.21158	929.263	897.469	242.594	59.2627
Treated biochar	CC	0	1	1	7.07	10.867	658.141	889.197	239.595	222.735
Treated biochar	CC	0	1	2	6.99	10.7012	660.313	901.949	239.514	224.513
Treated biochar	CC	0	1	3	6.93	8.90433	661.187	893.821	244.447	224.78
Treated biochar	CC	0	1	4	6.96	9.67949	678.791	923.516	247.241	225.403
Control	SS	0	1	1	6.16	4.54543	229.409	911.52	240.226	57.6981
Control	SS	0	1	2	6.78	4.54113	226.275	900.74	238.156	58.9899
Control	SS	0	1	3	6.15	5.12305	232.473	844.283	232.194	51.3039
Control	SS	0	1	4	5.99	6.32102	225.275	881.507	237.613	53.4888
Control	SS	1	1	1	5.57	6.4558	198.533	885.618	233.834	49.7129
Control	SS	1	1	2	5.36	8.53963	230.074	914.839	241.842	58.957
Control	SS	1	1	3	5.41	8.29659	184.279	892.866	240.222	55.3062
Control	SS	1	1	4	5.38	9.84365	181.465	907.685	239.207	58.0498
Untreated biochar	SS	0	1	1	5.63	24.097	297.686	1007.75	360.727	709.625
Untreated biochar	SS	0	1	2	5.8	17.4192	310.004	1025.8	368.236	645.698
Untreated biochar	SS	0	1	3	5.7	17.9285	325.742	1116.06	434.941	955.709
Untreated biochar	SS	0	1	4	5.78	19.3935	229.853	1032.6	374.048	616.503
Untreated biochar	SS	1	1	1	5.73	21.5547	246.807	1021.81	358.832	698.303
Untreated biochar	SS	1	1	2	5.74	23.6102	191.971	1085.41	373.546	716.892
Untreated biochar	SS	1	1	3	5.76	23.9553	214.457	1040.4	361.665	674.254
Untreated biochar	SS	1	1	4	5.69	20.8203	190.055	1073.42	374.054	806.516
Treated biochar	SS	0	1	1	6.27	24.5398	228.941	964.214	358.029	284.12
Treated biochar	SS	0	1	2	6.3	21.973	312.632	930.864	349.232	303.604
Treated biochar	SS	0	1	3	6.35	28.4278	325.855	960.054	368.335	284.213
Treated biochar	SS	0	1	4	6.42	26.1153	312.344	985.44	371.598	296.139
Treated biochar	SS	1	1	1	6.42	20.6243	425.24	999.37	346.724	262.48
Treated biochar	SS	1	1	2	6.29	32.806	265.688	1021.43	375.397	327.297
Treated biochar	SS	1	1	3	6.31	28.4053	208.435	975.285	365.236	307.3
Treated biochar	SS	1	1	4	6.31	25.9625	153.418	962.576	371.766	291.789
Control	CC	0	2	1	6.07	1.87594	307.275	524.511	167.392	55.9462
Control	CC	0	2	2	6.06	1.73226	297.266	525.647	162.527	49.0731
Control	CC	0	2	3	6.14	2.00902	288.804	585.232	177.576	50.4665
Control	CC	0	2	4	6	2.04194	288.855	521.701	158.276	57.6273
Control	CC	1	2	1	5	7.55066	319.976	724.406	224.457	73.9962
Control	CC	1	2	2	4.74	7.24827	203.312	471.486	140.303	49.3056
Control	CC	1	2	3	4.88	9.75552	272.992	438.321	138.443	48.8614
Control	CC	1	2	4	4.76	8.94007	704.591	568.796	180.076	62.0879
Untreated biochar	CC	1	2	1	5.2	10.3979	576.604	456.672	138.03	53.7024
Untreated biochar	CC	1	2	2	5.23	13.3774	655.755	545.961	178.243	62.7363
Untreated biochar	CC	1	2	3	5.23	11.9943	627.008	553.736	180.254	65.4804
Untreated biochar	CC	1	2	4	5.34	9.40696	456.549	498.375	169.665	212.901
Treated biochar	CC	1	2	1	5.13	8.97815	505.22	480.824	157.137	162.576
Treated biochar	CC	1	2	2	5.17	16.312	582.973	516.487	169.81	169.02
Treated biochar	CC	1	2	3	5.12	15.5507	459.437	593.1	189.3	219.357
Treated biochar	CC	1	2	4	5.19	13.8113	429.69	579.313	154.255	196.74
Untreated biochar	CC	0	2	1	6.98	6.81893	949.047	838.616	239.6	54.2968
Untreated biochar	CC	0	2	2	6.55	11.7357	948.847	842.792	241.327	55.323
Untreated biochar	CC	0	2	3	6.63	8.12852	924.188	798.314	231.477	53.0125
Untreated biochar	CC	0	2	4	6.77	8.52665	924.691	825.708	232.669	51.2519
Treated biochar	CC	0	2	1	7.31	7.36697	620.08	786.066	226.198	200.464
Treated biochar	CC	0	2	2	7.19	11.8895	631.051	809.185	230.81	192.918
Treated biochar	CC	0	2	3	7.35	8.21476	606.512	757.186	219.923	189.68
Treated biochar	CC	0	2	4	7.25	10.8202	597.176	770.725	228.047	183.156
Control	SS	0	2	1	6.41	6.43415	191.013	852.085	231.398	42.128
Control	SS	0	2	2	6.38	7.45703	185.445	835.087	223.736	39.5882
Control	SS	0	2	3	6.42	10.5319	184.983	821.667	227.198	43.0373
Control	SS	0	2	4	6.37	11.0773	172.956	830.933	225.563	37.9594
Control	SS	1	2	1	5.42	15.4832	199.414	825.819	215.866	37.1223
Control	SS	1	2	2	5.21	14.8606	181.141	850.271	221.286	45.8288
Control	SS	1	2	3	5.39	13.4091	89.9402	771.181	192.044	39.3649
Control	SS	1	2	4	5.26	17.818	141.741	793.761	199.114	32.0323
Untreated biochar	SS	0	2	1	5.8	35.9061	201.79	989.408	356.958	671.153
Untreated biochar	SS	0	2	2	5.84	26.7757	240.011	929.399	344.599	566.647
Untreated biochar	SS	0	2	3	5.83	29.545	251.045	941.852	353.012	568.044
Untreated biochar	SS	0	2	4	5.8	27.7644	151.491	920.743	350.131	578.177
Untreated biochar	SS	1	2	1	5.45	45.6774	260.932	977.276	364.101	690.279
Untreated biochar	SS	1	2	2	5.62	44.0615	104.554	1006.89	354.972	707.648
Untreated biochar	SS	1	2	3	5.56	42.6765	158.5	912.546	342.626	628.149
Untreated biochar	SS	1	2	4	5.58	37.2739	114.569	998.581	376.876	770.928
Treated biochar	SS	0	2	1	6.36	28.6716	149.025	867.556	348.011	272.006
Treated biochar	SS	0	2	2	6.36	32.9933	272.031	901.911	361.61	279.348
Treated biochar	SS	0	2	3	6.37	35.3412	262.202	870.871	363.33	276.985
Treated biochar	SS	0	2	4	6.19	33.9159	265.647	858.524	351.956	309.088
Treated biochar	SS	1	2	1	6.1	37.6809	234.507	912.346	336.142	275.63
Treated biochar	SS	1	2	2	6.02	48.576	174.173	862.684	337.626	293.882
Treated biochar	SS	1	2	3	6.11	43.3805	82.4338	858.384	339.02	293.231
Treated biochar	SS	1	2	4	6.02	44.446	121.023	864.688	340.111	289.443
Control	CC	0	3	1	6.26	3.49402	306.77	718.659	223.025	61.335	0.153708	1.3265
Control	CC	0	3	2	6.21	3.15436	344.61	704.226	228.685	67.7858	0.165516	1.4284
Control	CC	0	3	3	6.23	2.69949	283.855	712.332	222.167	58.6989	0.146837	1.2672
Control	CC	0	3	4	6.37	2.70991	279.206	684.913	213.612	59.6161	0.146848	1.2673
Control	CC	1	3	1	4.61	16.0837	234.091	637.637	180.882	66.7146	0.163893	1.4144
Control	CC	1	3	2	4.49	10.5917	235.077	619.319	180.283	56.3212	0.161101	1.3903
Control	CC	1	3	3	4.58	16.5086	177.578	618.949	176.794	63.0875	0.17372	1.4992
Control	CC	1	3	4	4.62	15.9396	242.857	724.26	184.609	55.4234	0.159386	1.3755
Untreated biochar	CC	1	3	1	5.23	15.3753	488.445	507.657	148.353	46.665	0.306431	2.6445
Untreated biochar	CC	1	3	2	5.43	19.2785	384.455	531.812	146.375	36.666	0.296895	2.5622
Untreated biochar	CC	1	3	3	5.38	15.057	359.147	543.361	153.636	42.1682	0.308494	2.6623
Untreated biochar	CC	1	3	4	5.73	17.758	340.347	541.081	150.106	31.8992	0.316408	2.7306
Treated biochar	CC	1	3	1	4.83	21.7834	472.419	496.622	152.073	92.8202	0.318273	2.7467
Treated biochar	CC	1	3	2	5.09	20.1686	334.88	574.084	181.523	173.701	0.310846	2.6826
Treated biochar	CC	1	3	3	5.54	16.7825	303.358	593.488	170.592	127.35	0.336582	2.9047
Treated biochar	CC	1	3	4	5.23	19.78	278.006	513.515	144.704	69.6549	0.367764	3.1738
Untreated biochar	CC	0	3	1	6.74	7.58577	889.917	797.668	238.196	58.0236	0.351993	3.0377
Untreated biochar	CC	0	3	2	6.7	8.05024	925.343	832.592	247.701	56.4622	0.352375	3.041
Untreated biochar	CC	0	3	3	6.74	7.67222	921.796	837.923	242.625	53.1497	0.348111	3.0042
Untreated biochar	CC	0	3	4	6.74	7.7391	931.281	852.906	242.482	51.8903	0.371194	3.2034
Treated biochar	CC	0	3	1	7.11	11.251	605.55	848.636	248.002	223.685	0.319027	2.7532
Treated biochar	CC	0	3	2	7.14	11.636	627.477	893.955	253.346	216.977	0.342271	2.9538
Treated biochar	CC	0	3	3	7.04	11.1565	595.878	874.753	246.169	223.452	0.386987	3.3397
Treated biochar	CC	0	3	4	7.01	14.6646	603.847	870.057	242.059	200.235	0.323175	2.789
Control	SS	0	3	1	6.25	5.97721	296.705	876.8	241.494	53.0983	0.130915	1.1298
Control	SS	0	3	2	6.25	6.31482	160.899	769.401	216.09	43.3189	0.125736	1.0851
Control	SS	0	3	3	6.37	7.09684	163.507	801.491	223.006	51.3068	0.127358	1.0991
Control	SS	0	3	4	6.45	6.53776	152.62	816.096	225.278	47.016	0.122109	1.0538
Control	SS	1	3	1	5.23	17.2291	117.896	628.336	142.346	21.7359	0.14175	1.2233
Control	SS	1	3	2	5.21	19.4598	104.713	653.904	144.695	26.9658	0.141078	1.2175
Control	SS	1	3	3	5.28	13.0536	73.7501	765.994	172.63	43.2476	0.138169	1.1924
Control	SS	1	3	4	5.23	16.199	96.8979	649.059	143.744	23.86	0.145933	1.2594
Untreated biochar	SS	0	3	1	5.85	35.2675	134.706	928.548	360.816	630.617	0.225353	1.9448
Untreated biochar	SS	0	3	2	5.9	28.5614	198.359	944.026	368.516	603.991	0.202851	1.7506
Untreated biochar	SS	0	3	3	5.92	27.0627	193.646	892.168	349.153	526.351	0.221136	1.9084
Untreated biochar	SS	0	3	4	5.88	6.68686	114.706	897.34	367.203	573.805	0.206871	1.7853
Untreated biochar	SS	1	3	1	5.67	58.3404	82.9067	836.132	274.617	123.986	0.232804	2.0091
Untreated biochar	SS	1	3	2	5.99	53.1592	53.9989	891.927	281.942	130.658	0.226744	1.9568
Untreated biochar	SS	1	3	3	5.83	70.1534	76.1087	811.35	262.24	119.06	0.236176	2.0382
Untreated biochar	SS	1	3	4	5.66	53.7356	60.3877	859.675	270.851	213.217	0.220857	1.906
Treated biochar	SS	0	3	1	6.29	33.9466	117.452	906.272	380.155	322.026	0.223893	1.9322
Treated biochar	SS	0	3	2	6.39	39.5257	245.119	908.725	396.365	243.435	0.195145	1.6841
Treated biochar	SS	0	3	3	6.34	38.7535	239.831	927.935	408.087	331.471	0.197683	1.706
Treated biochar	SS	0	3	4	6.34	39.9981	219.462	894.32	398.125	305.59	0.178123	1.5372
Treated biochar	SS	1	3	1	6.01	64.0296	103.15	897.641	349.639	99.5915	0.216941	1.8722
Treated biochar	SS	1	3	2	6.07	38.7258	79.215	949.631	355.084	146.856	0.223708	1.9306
Treated biochar	SS	1	3	3	6.19	53.8935	75.6492	920.345	336.587	138.421	0.227764	1.9656
Treated biochar	SS	1	3	4	6.04	53.0963	63.3591	876.362	313.82	151.276	0.232781	2.0089

## Sheet: Uptake
Treatment	Biochar	Crop	Rep	NU	PU	KU	CaU	MgU	Bu	CuU	FeU	MnU	ZnU
				mg pot-1	mg pot-1	mg pot-2	mg pot-3	mg pot-4	mg pot-5	mg pot-6	mg pot-7	mg pot-8	mg pot-9
Control+Fert	Control	1	1	255.732	16.1831	585.555	52.9548	34.3157	0.123713	0.089662	1.65549	4.19375	0.490108
Control+Fert	Control	1	2	239.564	14.9257	514.537	47.8921	28.3872	0.107192	0.0933536	1.22357	4.6506	0.436942
Control+Fert	Control	1	3	198.368	14.1891	481.931	48.4018	28.6334	0.113907	0.0784385	1.57815	4.84231	0.449446
Control+Fert	Control	1	4	217.526	11.59	388.794	42.1731	23.7538	0.104614	0.0664013	0.862678	4.46775	0.396882
UT CC+Fert	CC	1	1	221.77	28.2661	829.566	51.5532	34.675	0.15633	0.107697	1.19411	2.03457	2.59366
UT CC+Fert	CC	1	2	173.542	22.1693	790.91	53.2894	32.6138	0.160817	0.0995251	1.24449	1.73465	1.82439
UT CC+Fert	CC	1	3	204.99	30.9755	920.851	58.5678	33.8228	0.193846	0.131971	1.31313	2.12398	2.64592
UT CC+Fert	CC	1	4	256.918	28.9744	867.943	46.3078	32.8466	0.143499	0.116267	1.18033	1.85313	2.39939
T CC+Fert	CC	1	1	177.412	22.7696	807.201	60.8669	40.8886	0.126852	0.107966	1.0586	1.73194	0.715222
T CC+Fert	CC	1	2	254.985	26.8258	877.99	60.3007	41.5385	0.145875	0.128564	1.32158	2.21997	0.80181
T CC+Fert	CC	1	3	212.663	14.2147	507.926	33.1722	27.5952	0.0971252	0.0672383	1.62293	1.5174	0.500387
T CC+Fert	CC	1	4	175.477	23.5352	913.458	56.5428	40.2944	0.15784	0.113954	2.50261	1.9074	0.745439
Control+Fert	Control	3	1	168.55	8.54399	264.934	25.0631	17.4746	0.0679648	0.0457809	7.68106	7.6809	0.393971
Control+Fert	Control	3	2	138.846	6.35727	225.215	24.0067	15.6994	0.0540318	0.0385293	3.52193	7.67588	0.315286
Control+Fert	Control	3	3	128.228	6.93639	192.367	33.609	21.4739	0.11262	0.0451242	1.88157	10.088	0.4322
Control+Fert	Control	3	4	117.348	7.67508	224.406	24.7428	18.3918	0.115618	0.0402505	1.364	10.3266	0.310582
UT CC+Fert	CC	3	1	215.726	14.113	421.122	37.0441	25.0995	0.112167	0.0562957	0.887125	6.49697	2.60912
UT CC+Fert	CC	3	2	202.617	19.5274	343.672	25.1792	22.2962	0.125651	0.0774865	1.20398	4.8888	1.13649
UT CC+Fert	CC	3	3	268.212	25.1419	570.88	37.9172	34.4711	0.132689	0.0840852	1.23109	4.46753	2.58077
UT CC+Fert	CC	3	4	164.525	24.1871	448.031	37.5524	35.1105	0.134376	0.0818943	1.30993	2.47364	2.40752
T CC+Fert	CC	3	1	94.368	5.67707	164.999	13.0042	10.3811	0.0355174	0.0187907	0.337795	2.68572	0.254685
T CC+Fert	CC	3	2	175.034	13.1382	346.335	28.369	24.9623	0.0849206	0.0500451	0.554928	4.24468	0.467967
T CC+Fert	CC	3	3	289.783	27.3906	483.244	31.6698	30.907	0.133432	0.0806388	1.00162	5.39983	0.546649
T CC+Fert	CC	3	4	153.804	10.9417	315.783	24.2522	20.999	0.085349	0.0453696	0.688247	5.04478	0.392036
Control+Fert	Control	1	1	141.751	7.3314	205.368	16.4394	11.7351	0.0479413	0.0360398	1.83623	0.591336	0.178578
Control+Fert	Control	1	2	159.707	9.6676	260.88	20.3503	13.5455	0.0621472	0.0474323	0.818281	0.899624	0.23078
Control+Fert	Control	1	3	213.415	11.9874	330.53	22.6145	16.2435	0.060613	0.0572476	3.93299	1.48484	0.267617
Control+Fert	Control	1	4	192.991	12.2097	340.041	22.795	18.1125	0.0567941	0.0602841	1.29654	1.29802	0.287441
UT SS+Fert	SS	1	1	347.736	32.3906	586.015	42.4097	39.1285	0.131131	0.109641	2.14493	3.59781	1.12222
UT SS+Fert	SS	1	2	370.341	36.5216	692.139	49.2927	48.1122	0.172505	0.105648	1.24194	2.76507	1.20001
UT SS+Fert	SS	1	3	387.641	37.3773	746.998	46.7412	50.6182	0.172139	0.111408	1.22451	3.29937	1.41826
UT SS+Fert	SS	1	4	417.584	41.268	769.679	46.8736	49.3198	0.160437	0.129108	0.964319	3.5437	1.55106
T SS+Fert	SS	1	1	234.36	23.436	534.341	35.154	35.154	0.140616	0.070308	0.93744	0.82026	0.632772
T SS+Fert	SS	1	2	191.506	26.1787	518.835	28.8699	32.8561	0.140911	0.0698429	0.796385	0.716634	0.603912
T SS+Fert	SS	1	3	299.83	38.2875	619.959	40.8311	37.0065	0.131949	0.0978072	1.57335	1.00363	0.740894
T SS+Fert	SS	1	4	276.496	44.9476	668.116	43.8943	40.7616	0.133453	0.101687	1.28496	1.09235	0.761779
Control+Fert	Control	3	1	159.258	9.74033	216.89	29.1651	23.7906	0.0945116	0.0380801	0.832887	1.46389	0.239823
Control+Fert	Control	3	2	147.695	9.67551	216.681	32.6468	24.3772	0.106304	0.0408907	0.41331	2.36135	0.226234
Control+Fert	Control	3	3	103.44	6.09741	159.332	19.6619	20.5176	0.0897618	0.0268225	0.318233	1.23675	0.164417
Control+Fert	Control	3	4	144.797	8.68386	212.94	31.4352	25.5537	0.137426	0.0386111	0.305408	2.69716	0.202671
UT SS+Fert	SS	3	1	189.455	30.3134	373.302	35.6885	61.8967	0.320934	0.0906973	0.851253	3.64729	1.16072
UT SS+Fert	SS	3	2	294.248	41.1504	269.162	44.7694	79.5783	0.305248	0.0819037	0.774852	2.32557	0.705773
UT SS+Fert	SS	3	3	239.89	33.93	318.698	50.142	68.1895	0.261368	0.0861609	0.98388	2.53005	0.933802
UT SS+Fert	SS	3	4	103.104	40.3951	282.176	49.3752	87.7783	0.443004	0.0800479	0.834146	2.02374	0.752046
T SS+Fert	SS	3	1	156.009	33.9333	371.571	38.5068	49.7251	0.240328	0.0659673	0.877089	0.818511	0.471717
T SS+Fert	SS	3	2	249.233	40.4018	342.607	52.1697	72.3568	0.245539	0.0827245	1.00323	1.27874	0.686643
T SS+Fert	SS	3	3	152.574	33.0355	187.861	43.7518	81.7425	0.308701	0.0581582	0.842673	0.792102	0.45938
T SS+Fert	SS	3	4	200.167	49.5625	326.721	74.295	113.924	0.58112	0.1106	2.98464	2.38344	0.937191

## Sheet: Dry Wt
Treatment	Biochar	Fertilizer	Crop	Rep	Dry Wt (g)
Control	CC	- Fert	1	A	1.157
Control	CC	- Fert	1	B	1.026
Control	CC	- Fert	1	C	1.489
Control	CC	- Fert	1	D	1.318
Untreated biochar	CC	- Fert	1	A	1.131
Untreated biochar	CC	- Fert	1	B	0.984
Untreated biochar	CC	- Fert	1	C	1.088
Untreated biochar	CC	- Fert	1	D	1.021
Treated biochar	CC	- Fert	1	A	1.454
Treated biochar	CC	- Fert	1	B	1.225
Treated biochar	CC	- Fert	1	C	1.259
Treated biochar	CC	- Fert	1	D	0.866
Control	CC	+ Fert	1	A	5
Control	CC	+ Fert	1	B	4.4
Control	CC	+ Fert	1	C	4.9
Control	CC	+ Fert	1	D	5.6
Untreated biochar	CC	+ Fert	1	A	8.2
Untreated biochar	CC	+ Fert	1	B	9.4
Untreated biochar	CC	+ Fert	1	C	12
Untreated biochar	CC	+ Fert	1	D	13.2
Treated biochar	CC	+ Fert	1	A	3
Treated biochar	CC	+ Fert	1	B	6.4
Treated biochar	CC	+ Fert	1	C	9.4
Treated biochar	CC	+ Fert	1	D	7.3
Control	CC	- Fert	2	A	0.6
Control	CC	- Fert	2	B	0.6
Control	CC	- Fert	2	C	0.7
Control	CC	- Fert	2	D	0.6
Untreated biochar	CC	- Fert	2	A	0.4
Untreated biochar	CC	- Fert	2	B	0.5
Untreated biochar	CC	- Fert	2	C	0.5
Untreated biochar	CC	- Fert	2	D	0.5
Treated biochar	CC	- Fert	2	A	0.5
Treated biochar	CC	- Fert	2	B	0.5
Treated biochar	CC	- Fert	2	C	0.5
Treated biochar	CC	- Fert	2	D	0.6
Control	CC	+ Fert	2	A	5.3
Control	CC	+ Fert	2	B	5.5
Control	CC	+ Fert	2	C	17.6
Control	CC	+ Fert	2	D	15.7
Untreated biochar	CC	+ Fert	2	A	6.1
Untreated biochar	CC	+ Fert	2	B	11
Untreated biochar	CC	+ Fert	2	C	8.9
Untreated biochar	CC	+ Fert	2	D	12.7
Treated biochar	CC	+ Fert	2	A	7.7
Treated biochar	CC	+ Fert	2	B	7.4
Treated biochar	CC	+ Fert	2	C	9
Treated biochar	CC	+ Fert	2	D	15.2
Control	CC	- Fert	3	A	0.6
Control	CC	- Fert	3	B	1
Control	CC	- Fert	3	C	0.7
Control	CC	- Fert	3	D	0.9
Untreated biochar	CC	- Fert	3	A	1.9
Untreated biochar	CC	- Fert	3	B	1.4
Untreated biochar	CC	- Fert	3	C	1.1
Untreated biochar	CC	- Fert	3	D	1
Treated biochar	CC	- Fert	3	A	1.3
Treated biochar	CC	- Fert	3	B	2.4
Treated biochar	CC	- Fert	3	C	1.9
Treated biochar	CC	- Fert	3	D	1.7
Control	CC	+ Fert	3	A	5
Control	CC	+ Fert	3	B	4.4
Control	CC	+ Fert	3	C	4.9
Control	CC	+ Fert	3	D	5.6
Untreated biochar	CC	+ Fert	3	A	8.2
Untreated biochar	CC	+ Fert	3	B	9.4
Untreated biochar	CC	+ Fert	3	C	12
Untreated biochar	CC	+ Fert	3	D	13.2
Treated biochar	CC	+ Fert	3	A	3
Treated biochar	CC	+ Fert	3	B	6.4
Treated biochar	CC	+ Fert	3	C	9.4
Treated biochar	CC	+ Fert	3	D	7.3
Control	SS	- Fert	1	A	1.43
Control	SS	- Fert	1	B	1.286
Control	SS	- Fert	1	C	1.484
Control	SS	- Fert	1	D	1.482
Control	SS	+ Fert	1	A	3.709
Control	SS	+ Fert	1	B	5.341
Control	SS	+ Fert	1	C	6.228
Control	SS	+ Fert	1	D	6.328
Untreated biochar	SS	- Fert	1	A	6.883
Untreated biochar	SS	- Fert	1	B	5.172
Untreated biochar	SS	- Fert	1	C	5.41
Untreated biochar	SS	- Fert	1	D	7.254
Untreated biochar	SS	+ Fert	1	A	9.907
Untreated biochar	SS	+ Fert	1	B	13.596
Untreated biochar	SS	+ Fert	1	C	13.226
Untreated biochar	SS	+ Fert	1	D	14.219
Treated biochar	SS	- Fert	1	A	10.252
Treated biochar	SS	- Fert	1	B	1.888
Treated biochar	SS	- Fert	1	C	1.895
Treated biochar	SS	- Fert	1	D	2.167
Treated biochar	SS	+ Fert	1	A	11.718
Treated biochar	SS	+ Fert	1	B	10.881
Treated biochar	SS	+ Fert	1	C	11.898
Treated biochar	SS	+ Fert	1	D	13.756
Control	SS	- Fert	2	A	1.2
Control	SS	- Fert	2	B	1.3
Control	SS	- Fert	2	C	1.1
Control	SS	- Fert	2	D	1.7
Control	SS	+ Fert	2	A	2.3
Control	SS	+ Fert	2	B	5.1
Control	SS	+ Fert	2	C	8
Control	SS	+ Fert	2	D	4.9
Untreated biochar	SS	- Fert	2	A	3.5
Untreated biochar	SS	- Fert	2	B	2.1
Untreated biochar	SS	- Fert	2	C	1.9
Untreated biochar	SS	- Fert	2	D	2.2
Untreated biochar	SS	+ Fert	2	A	3.6
Untreated biochar	SS	+ Fert	2	B	9.7
Untreated biochar	SS	+ Fert	2	C	5.6
Untreated biochar	SS	+ Fert	2	D	8.8
Treated biochar	SS	- Fert	2	A	1.6
Treated biochar	SS	- Fert	2	B	1.5
Treated biochar	SS	- Fert	2	C	1.5
Treated biochar	SS	- Fert	2	D	1.5
Treated biochar	SS	+ Fert	2	A	11.6
Treated biochar	SS	+ Fert	2	B	7
Treated biochar	SS	+ Fert	2	C	11.4
Treated biochar	SS	+ Fert	2	D	7.9
Control	SS	- Fert	3	A	0.4
Control	SS	- Fert	3	B	1.1
Control	SS	- Fert	3	C	0.7
Control	SS	- Fert	3	D	1.7
Control	SS	+ Fert	3	A	6.6
Control	SS	+ Fert	3	B	5.9
Control	SS	+ Fert	3	C	4.4
Control	SS	+ Fert	3	D	6.6
Untreated biochar	SS	- Fert	3	A	2.5
Untreated biochar	SS	- Fert	3	B	1.7
Untreated biochar	SS	- Fert	3	C	2.2
Untreated biochar	SS	- Fert	3	D	1.8
Untreated biochar	SS	+ Fert	3	A	17.5
Untreated biochar	SS	+ Fert	3	B	19.8
Untreated biochar	SS	+ Fert	3	C	16.1
Untreated biochar	SS	+ Fert	3	D	20.4
Treated biochar	SS	- Fert	3	A	2.5
Treated biochar	SS	- Fert	3	B	1.8
Treated biochar	SS	- Fert	3	C	2
Treated biochar	SS	- Fert	3	D	2.7
Treated biochar	SS	+ Fert	3	A	13.8
Treated biochar	SS	+ Fert	3	B	17.1
Treated biochar	SS	+ Fert	3	C	16.8
Treated biochar	SS	+ Fert	3	D	25.1

## Sheet: Metals Tissue
Treatment	Crop	Rep	As	Cd	Co	Cr	Ni	Pb	Se
Control	3	1	0.181779	0.422296	0.408717	4.86452	1.46864	0.128869	0.137405
Control	3	2	0.180481	0.362407	0.352096	2.77872	1.11355	0.119757	0.762997
Control	3	3	0.0851324	0.396762	0.271261	1.13476	0.677033	0.135405	0.235262
Control	3	4	0.0679594	0.269313	0.217167	0.735193	0.673328	0.0222929	0.250864
CC UT	3	1	0.145328	0.286931	0.0704114	0.367139	0.441446	0.213347	0.221979
CC UT	3	2	0.0951018	0.164982	0.0748831	0.3624	0.340953	0.37533	0.43285
CC UT	3	3	0.0490664	0.164925	0.0565005	0.322944	0.40241	0.177435	0.499069
CC UT	3	4	0.0675633	0.158936	0.00334832	0.316834	0.364677	0.0574874	0.647718
CC T	3	1	0.0721756	0.303383	0.143184	0.398677	0.488583	0.103334	0.335909
CC T	3	2	0.0537108	0.31785	0.106405	0.298483	0.157291	0.0877029	0.707031
CC T	3	3	0.117541	0.254928	0.0900163	0.340891	0.188464	0.189275	1.21757
CC T	3	4	0.0910964	0.239796	0.0915544	0.261042	0.60121	0.0864604	0.0742726
SS UT	3	1	0.0804606	0.184789	0.0784726	0.231294	0.268513	0.0889177	0.580127
SS UT	3	2	0.052602	0.0924445	0.0156888	0.255135	0.0947886	0.294409	0.233396
SS UT	3	3	0.0789895	0.131691	0.0167641	0.242896	0.119679	0.150564	0.497897
SS UT	3	4	Lost Sample--------------------------------------------------------------------------------------
SS T	3	1	0.0743809	0.0691726	0.0119686	0.255894	0.0338292	0.113758	0.831428
SS T	3	2	0.0737014	0.0725503	0.0193404	0.255087	1.71852	0.0292299	0.127748
SS T	3	3	0.0712121	0.02617	0.0220112	0.2527	0.00316848	0.102215	0.475267
SS T	3	4	0.107462	0.0539748	0.050385	0.377564	0.00436369	0.22354	0.0645927
